# Supplementary material for: Systematics of putative euparkeriids (Diapsida: Archosauriformes) from the Triassic of China
Source: PubMed Central journal article supplement (PMC4250070; doi:10.7717/peerj.658), 2014-11-25
Supplement: peerj-02-658-s002.pdf [file peerj-02-658-s002.pdf]

Table S2. **Supplementary table of Chinese names.** Names of localities, towns, administrative divisions and formations used in this article, showing their equivalents in simplified Chinese, Pinyin, and previously published romanizations and translations.

| Name used in this paper | Name in simplified Chinese characters | Name in Pinyin | Other romanizations/translations used in previous palaeontological publications |
|-------------------------|---------------------------------------|----------------|---------------------------------------------------------------------------------|
| Autonomous Region       | 自治区                                   | Zìzhìqū        |                                                                                 |
| Banner                  | 旗                                     | Qí             |                                                                                 |
| County                  | 县                                     | Xiàn           |                                                                                 |
| Ermaying                | 二马营                                   | Èrmǎyíng       | Er-Ma-Ying (Wu 1982)                                                            |
| Fugu                    | 府谷                                    | Fǔgǔ           |                                                                                 |
| Heshanggou              |                                       |                |                                                                                 |
| Jungar                  | 准格尔                                   | Zhǔngé'ěr      | Zhun-Ge-Er ("Zhun-Ge-Er-Qi"; Wu 1982)                                           |
| Louzeyu                 | 楼则峪                                   | Lóuzéyù        | Lotzeyue (Young 1964)                                                           |
| Nei Mongol              | 内蒙古                                   | Nèi Měnggǔ     | Inner Mongolia (Wu 1982)                                                        |
| Province                | 省                                     | Shěng          |                                                                                 |
| Shaanxi                 | 陕西                                    | Shǎnxī         | Shansi (Wu 1982)                                                                |
| Shanxi                  | 山西                                    | Shānxī         |                                                                                 |
| Wuxiang                 | 武乡                                    | Wǔxiāng        | Wuhsiang (Young 1964)                                                           |
| Xishiwa                 | 西什凹                                   | Xīshíwā        | Shishihwa (Young 1964)                                                          |
